# Supplementary material for: Visual detection of binary, ternary and quaternary protein interactions in fission yeast using a Pil1 co-tethering assay
Source: Oxford University Press journal article supplement (doi:10.1242/jcs.258774), 2021-09-09
Supplement: jcs258774supp.pdf [file jcs258774supp.pdf]

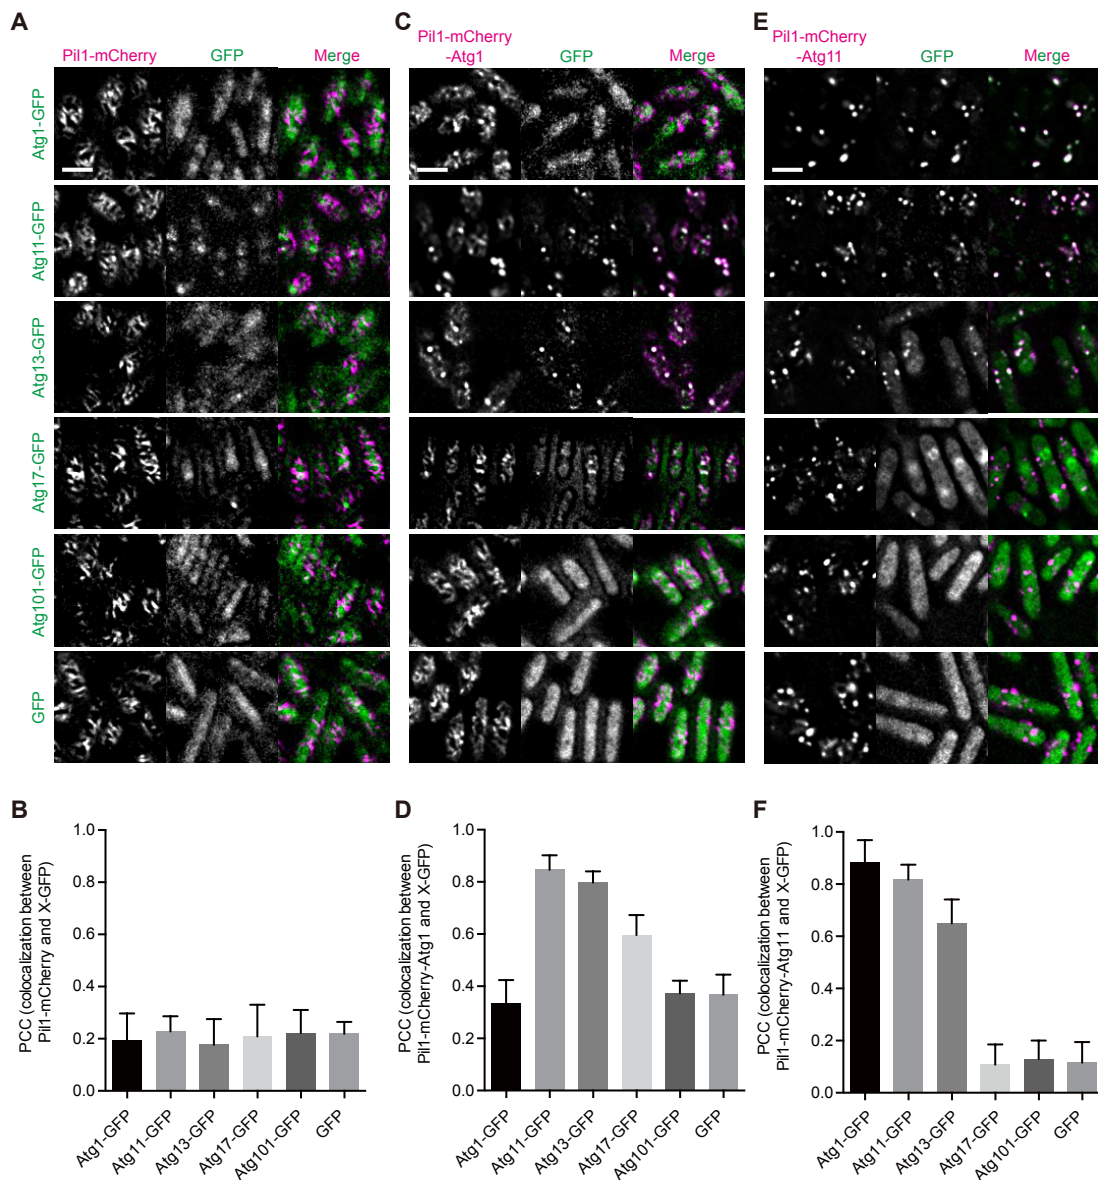

**Fig. S1. Pil1 co-tethering assay using Atg1 and Atg11 as bait and subunits of the Atg1 complex as prey.** (A) Experiments using Pil1-mCherry as a negative control bait. (B) Imaging data from the experiments shown in (A) were analyzed and the PCC values are presented as mean  $\pm$  s.d. (10 cells). (C) Experiments using the Pil-mCherry-Atg1 bait. (D) Imaging data from the experiments shown in (C) were analyzed and the PCC values are presented as mean  $\pm$  s.d. (10 cells). (E) Experiments using the Pil-mCherry-Atg11 bait. (F) Imaging data from the experiments shown in (E) were analyzed and the PCC values are presented as mean  $\pm$  s.d. (10 cells). Scale bars, 5  $\mu$ m.

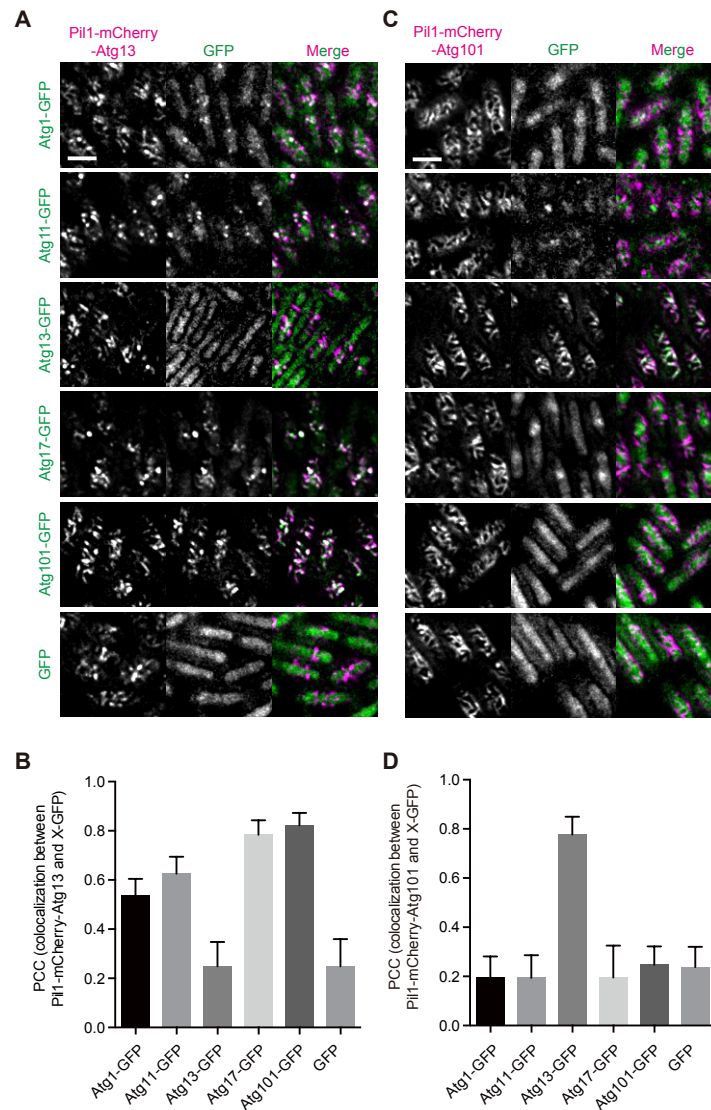

**Fig. S2. Pil1 co-tethering assay using Atg13 and Atg101 as bait and subunits of the Atg1 complex as prey.** (A) Experiments using the Pil1-mCherry-Atg13 bait. (B) Imaging data from the experiments shown in (A) were analyzed and the PCC values are presented as mean  $\pm$  s.d. (10 cells). (C) Experiments using the Pil1-mCherry-Atg101 bait. (D) Imaging data from the experiments shown in (C) were analyzed and the PCC values are presented as mean  $\pm$  s.d. (10 cells). Scale bars, 5  $\mu$ m.

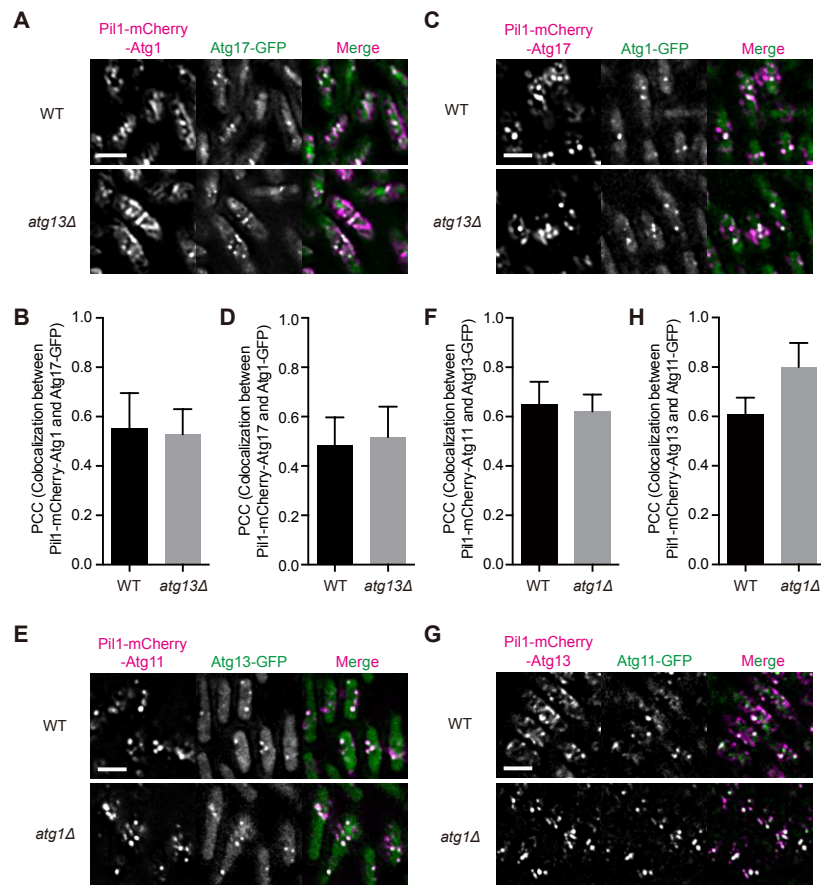

**Fig. S3. The interaction between Atg1 and Atg17 is independent of Atg13, and the interaction between Atg11 and Atg13 is independent of Atg1.** (A) The deletion of *atg13* did not affect the interaction between Atg1 and Atg17 when using Atg1 as bait. (B) Imaging data from the experiments shown in (A) were analyzed and the PCC values are presented as mean  $\pm$  s.d. (10 cells). (C) The deletion of *atg13* did not affect the interaction between Atg1 and Atg17 when using Atg17 as bait. (D) Imaging data from the experiments shown in (C) were analyzed and the PCC values are presented as mean  $\pm$  s.d. (10 cells). (E) The deletion of *atg1* did not affect the interaction between Atg11 and Atg13 when using Atg11 as bait. (F) Imaging data from the experiments shown in (E) were analyzed and the PCC values are presented as mean  $\pm$  s.d. (10 cells). (G) The deletion of *atg1* did not affect the interaction between Atg11 and Atg13 when using Atg13 as bait. (H) Imaging data from the experiments shown in (G) were analyzed and the PCC values are presented as mean  $\pm$  s.d. (10 cells). Scale bars, 5  $\mu$ m.

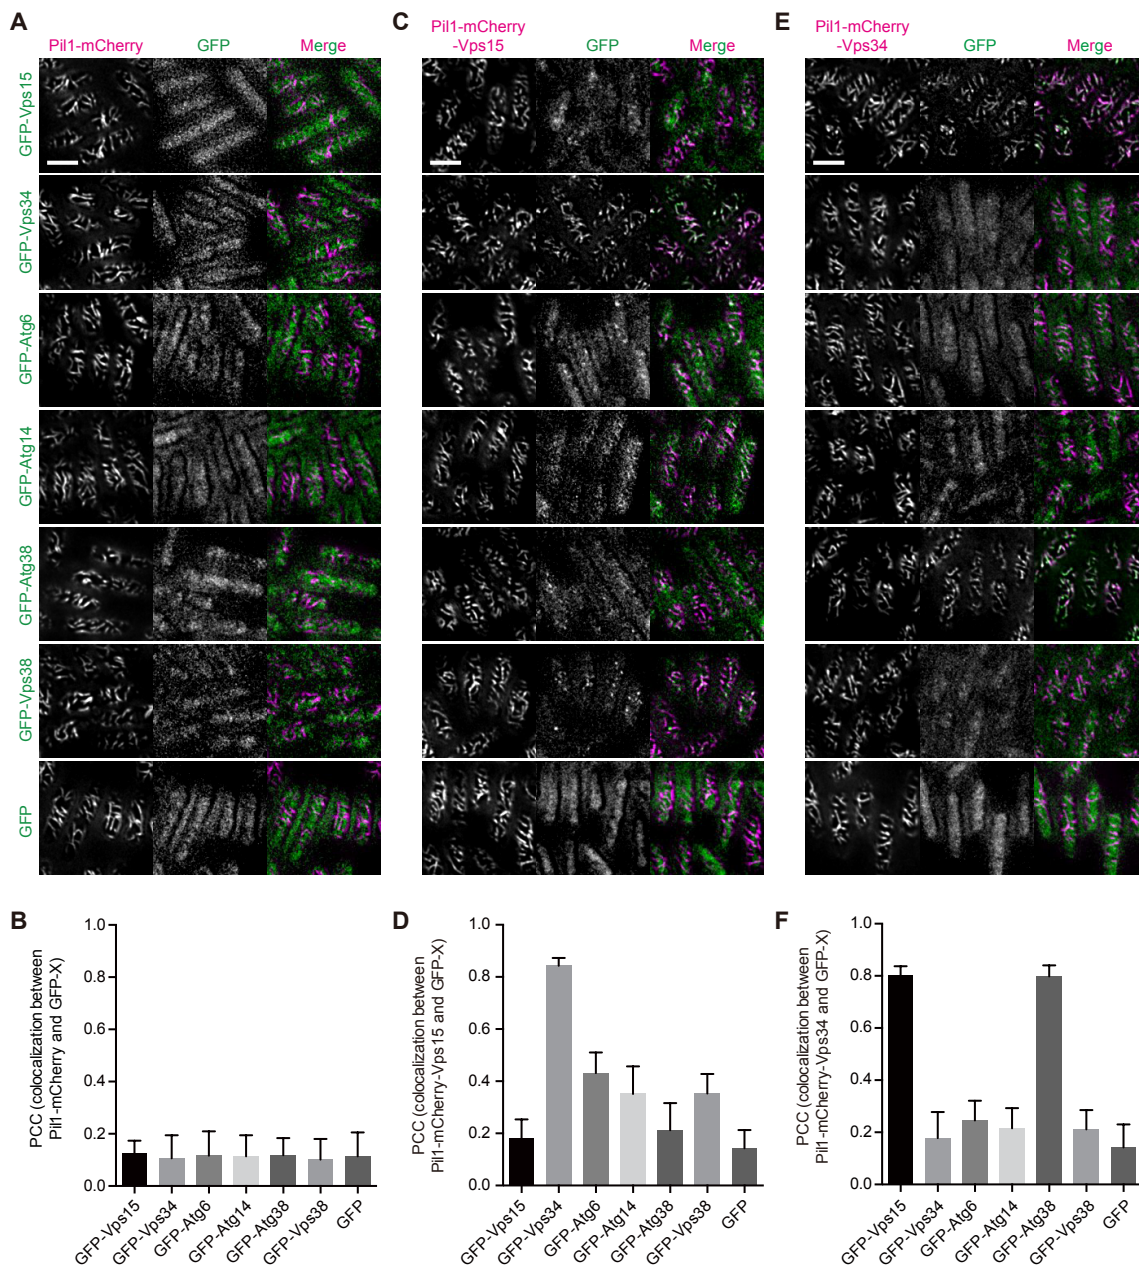

**Fig. S4. Pil1 co-tethering assay using Vps15 and Vps34 as bait and subunits of PtdIns3K complexes as prey.** (A) Experiments using Pil1-mCherry as a negative control bait. (B) Imaging data from the experiments shown in (A) were analyzed and the PCC values are presented as mean  $\pm$  s.d. (10 cells). (C) Experiments using Pil1-mCherry-Vps15 as bait. (D) Imaging data from the experiments shown in (C) were analyzed and the PCC values are presented as mean  $\pm$  s.d. (10 cells). (E) Experiments using Pil1-mCherry-Vps34 as bait. (F) Imaging data from the experiments shown in (E) were analyzed and the PCC values are presented as mean  $\pm$  s.d. (10 cells). Scale bars, 5  $\mu$ m.

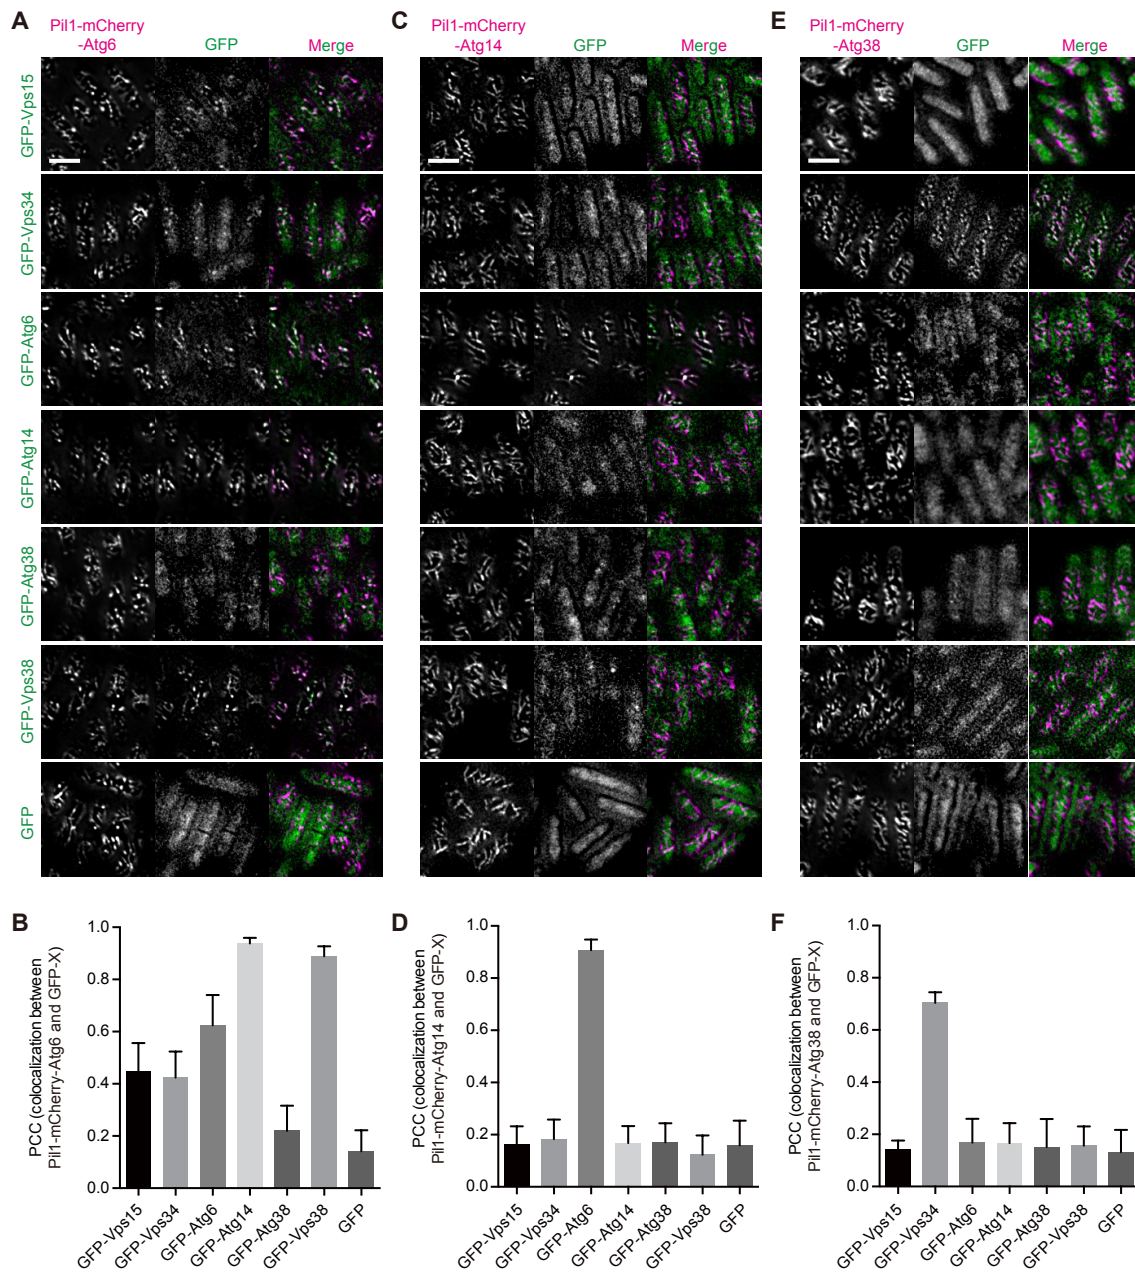

**Fig. S5. Pil1 co-tethering assay using Atg6, Atg14, and Atg38 as bait and subunits of PtdIns3K complexes as prey.** (A) Experiments using Pil1-mCherry-Atg6 as bait. (B) Imaging data from the experiments shown in (A) were analyzed and the PCC values are presented as mean  $\pm$  s.d. (10 cells). (C) Experiments using Pil1-mCherry-Atg14 as bait. (D) Imaging data from the experiments shown in (C) were analyzed and the PCC values are presented as mean  $\pm$  s.d. (10 cells). (E) Experiments using Pil1-mCherry-Atg38 as bait. (F) Imaging data from the experiments shown in (E) were analyzed and the PCC values are presented as mean  $\pm$  s.d. (10 cells). Scale bars, 5  $\mu$ m.

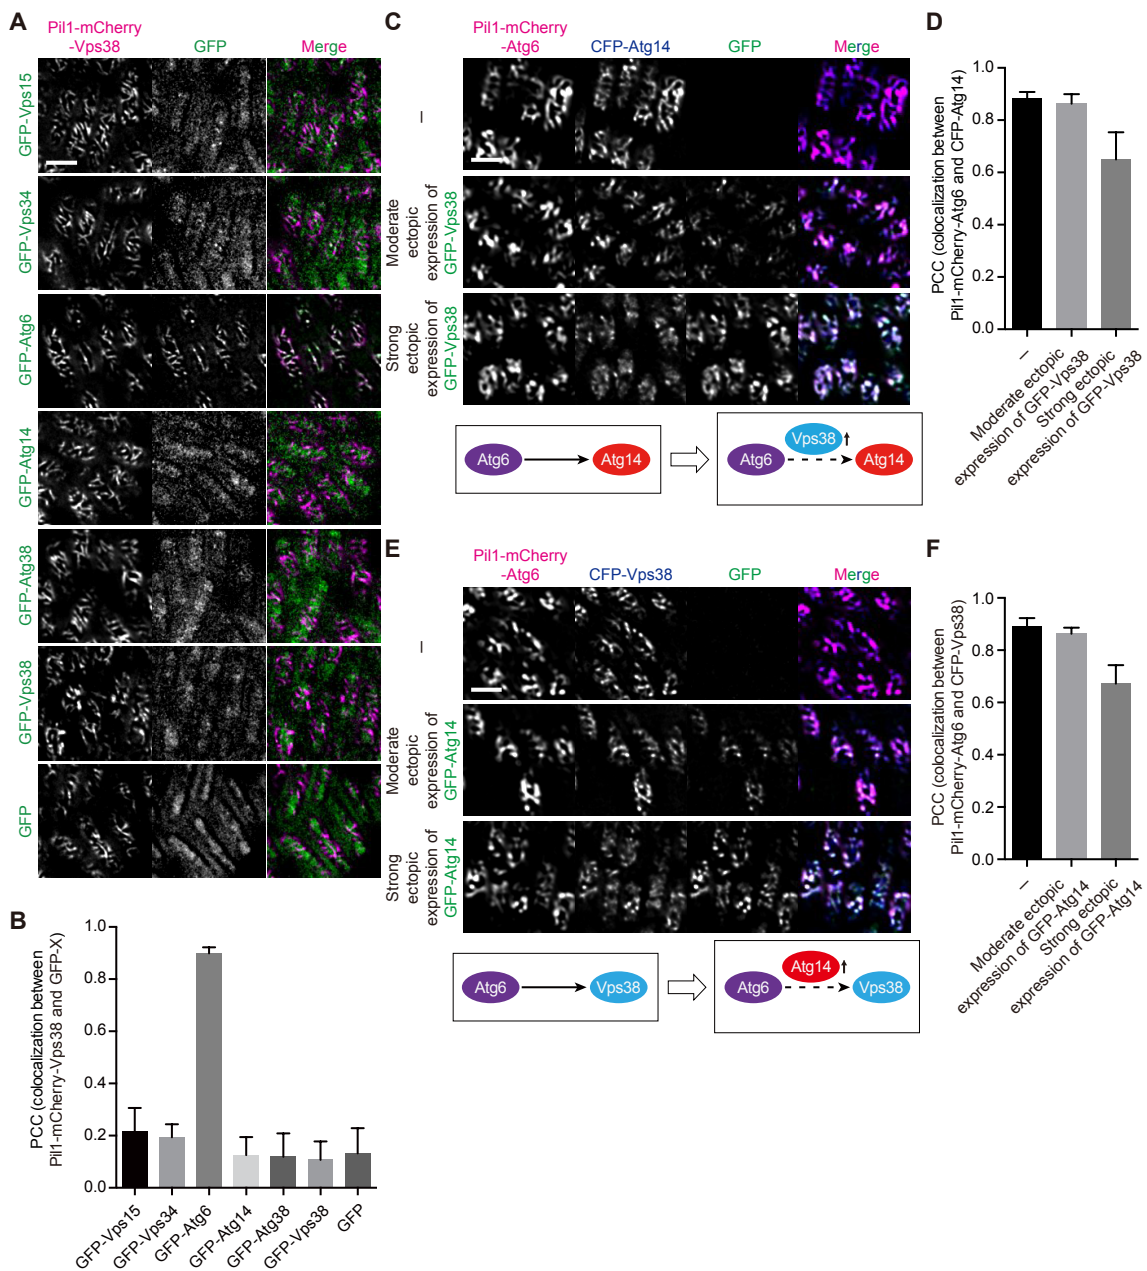

**Fig. S6. Atg14 and Vps38 compete with each other to bind Atg6 in the Pil1 co-tethering assay using Atg6 as bait.** (A) Experiments using Pil1-mCherry-Vps38 as bait. (B) Imaging data from the experiments shown in (A) were analyzed and the PCC values are presented as mean  $\pm$  s.d. (10 cells). (C) Strongly ectopically expressing Vps38 decreased the colocalization of Atg6 and Atg14. (D) Imaging data from the experiments shown in (C) were analyzed and the PCC values are presented as mean  $\pm$  s.d. (10 cells). (E) Strongly ectopically expressing Atg14 decreased the colocalization of Atg6 and Vps38. (F) Imaging data from the experiments shown in (E) were analyzed and the PCC values are presented as mean  $\pm$  s.d. (10 cells). Scale bars, 5  $\mu$ m.

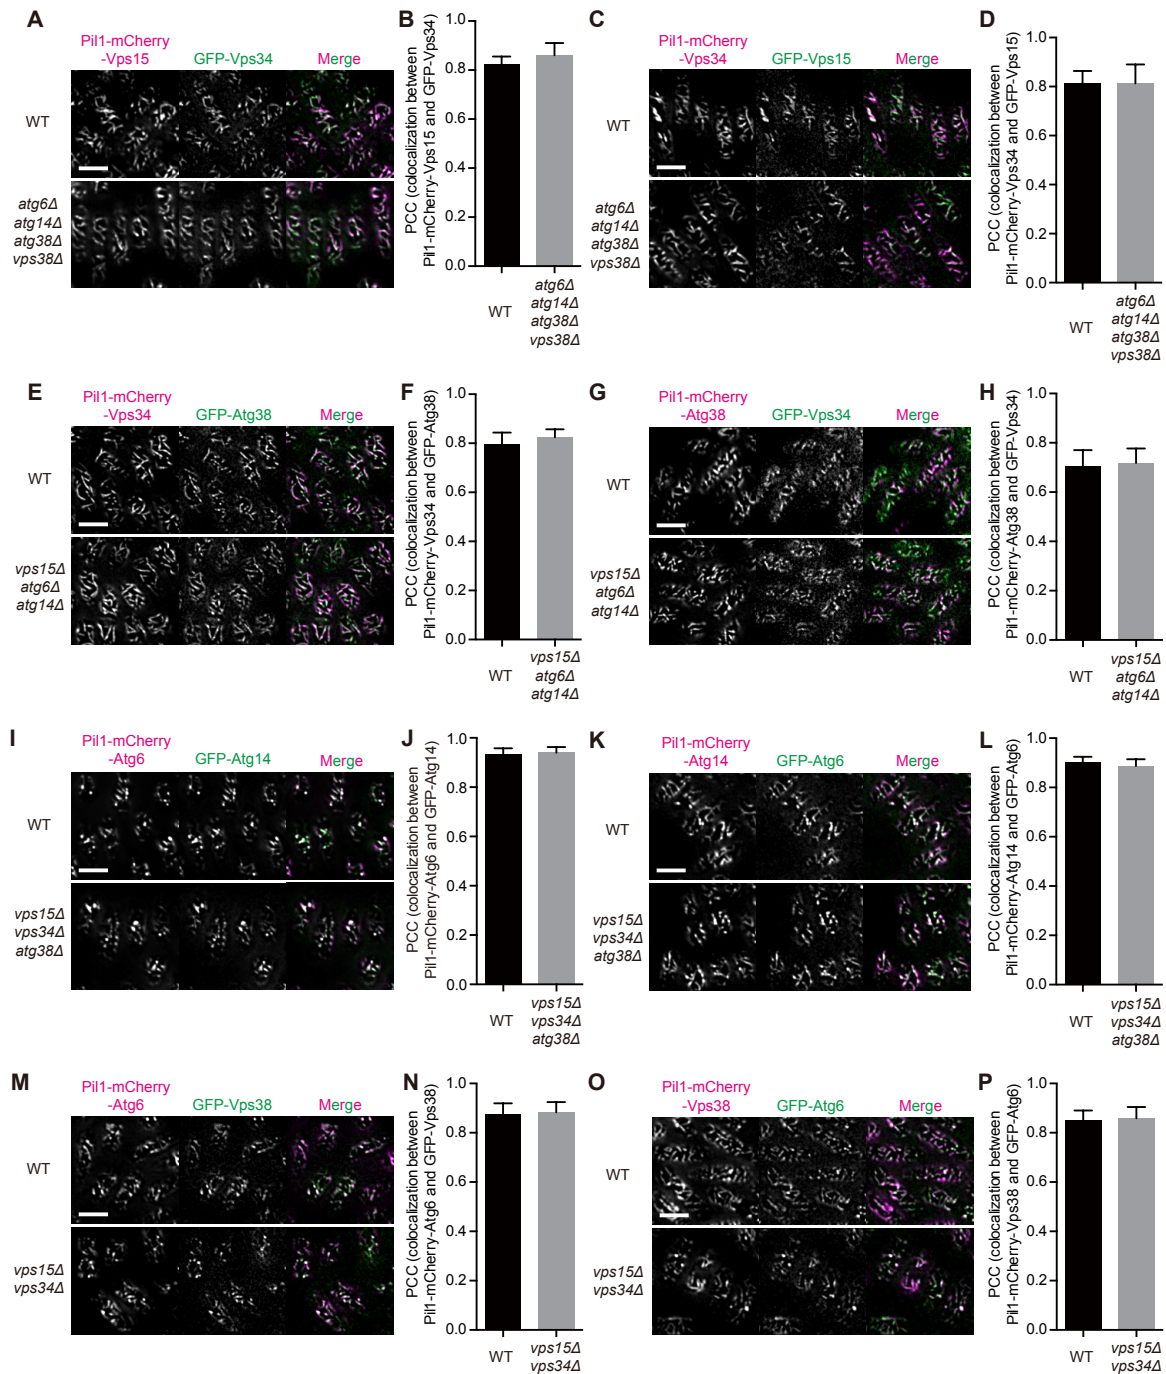

**Fig. S7. Interactions between Vps15 and Vps34, between Vps34 and Atg38, between Atg6 and Atg14, and between Atg6 and Vps38 are independent of the other subunits of PtdIns3K complexes.** (A) Deletion of *atg6*, *atg14*, *atg38*, and *vps38* did not influence the interaction between Vps15 and Vps34 when using Vps15 as bait. (B) Imaging data from the experiments shown in (A) were analyzed and the PCC values are presented as mean  $\pm$  s.d. (10

cells). (C) Deletion of *atg6*, *atg14*, *atg38*, and *vps38* did not influence the interaction between Vps15 and Vps34 when using Vps34 as bait. (D) Imaging data from the experiments shown in (C) were analyzed and the PCC values are presented as mean  $\pm$  s.d. (10 cells). (E) Deletion of *vps15*, *atg6*, and *atg14* did not influence the interaction between Vps34 and Atg38 when using Vps34 as bait. (F) Imaging data from the experiments shown in (E) were analyzed and the PCC values are presented as mean  $\pm$  s.d. (10 cells). (G) Deletion of *vps15*, *atg6*, and *atg14* did not influence the interaction between Vps34 and Atg38 when using Atg38 as bait. (H) Imaging data from the experiments shown in (G) were analyzed and the PCC values are presented as mean  $\pm$  s.d. (10 cells). (I) Deletion of *vps15*, *vps34*, and *atg38* did not influence the interaction between Atg6 and Atg14 when using Atg6 as bait. (J) Imaging data from the experiments shown in (I) were analyzed and the PCC values are presented as mean  $\pm$  s.d. (10 cells). (K) Deletion of *vps15*, *vps34*, and *atg38* did not influence the interaction between Atg6 and Atg14 when using Atg14 as bait. (L) Imaging data from the experiments shown in (K) were analyzed and the PCC values are presented as mean  $\pm$  s.d. (10 cells). (M) Deletion of *vps15* and *vps34* did not influence the interaction between Atg6 and Vps38 when using Atg6 as bait. (N) Imaging data from the experiments shown in (M) were analyzed and the PCC values are presented as mean  $\pm$  s.d. (10 cells). (O) Deletion of *vps15* and *vps34* did not influence the interaction between Atg6 and Vps38 when using Vps38 as bait. (P) Imaging data from the experiments shown in (O) were analyzed and the PCC values are presented as mean  $\pm$  s.d. (10 cells). Scale bars, 5  $\mu$ m.



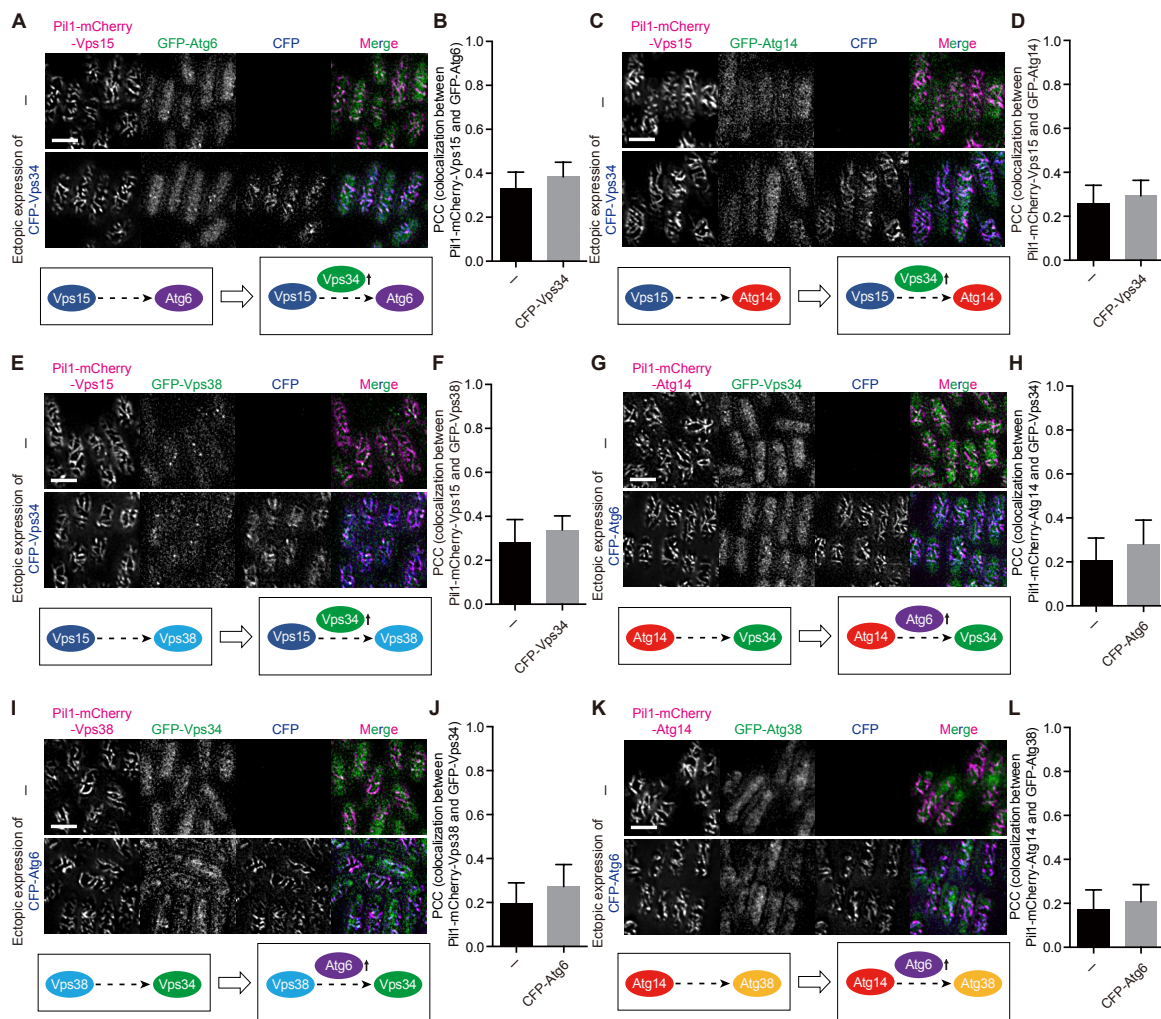

**Fig. S8. The Vps15-Vps34 subcomplex does not interact with Atg6, Atg14, and Vps38; the Atg6-Atg14 subcomplex does not interact with Vps34 and Atg38; the Atg6-Vps38 subcomplex does not interact with Vps34.** (A) Ectopic expression of Vps34 did not lead to the colocalization of Vps15 and Atg6. (B) Imaging data from the experiments shown in (A) were analyzed and the PCC values are presented as mean  $\pm$  s.d. (10 cells). (C) Ectopic expression of Vps34 did not lead to the colocalization of Vps15 and Atg14. (D) Imaging data from the experiments shown in (C) were analyzed and the PCC values are presented as mean  $\pm$  s.d. (10 cells). (E) Ectopic expression of Vps34 did not lead to the colocalization of Vps15 and Vps38. (F) Imaging data from the experiments shown in (E) were analyzed and the PCC values are presented as mean  $\pm$  s.d. (10 cells). (G) Ectopic expression of Atg6 did not lead to the colocalization of Atg14 and Vps34. (H) Imaging data from the experiments shown in (G) were analyzed and the PCC values are presented as mean  $\pm$  s.d. (10 cells). (I) Ectopic

expression of Atg6 did not lead to the colocalization of Vps38 and Vps34. (J) Imaging data from the experiments shown in (I) were analyzed and the PCC values are presented as mean  $\pm$  s.d. (10 cells). (K) Ectopic expression of Atg6 did not lead to the colocalization of Atg14 and Atg38. (L) Imaging data from the experiments shown in (K) were analyzed and the PCC values are presented as mean  $\pm$  s.d. (10 cells). Scale bars, 5  $\mu$ m.

**Table S1.** Strains used in this study

| Strain  | Mating Type | Genotype                                                                                                                                         | Use                 |
|---------|-------------|--------------------------------------------------------------------------------------------------------------------------------------------------|---------------------|
| DY39067 | h?          | <i>leu1-32::41nmt1p-GFP(leu1+) ars1::41nmt1p-pil1-mCherry(ura4+)</i>                                                                             | Fig. 1A             |
| DY37285 | h-          | <i>atg38A::kanMX leu1-32::41nmt1p-pil1-mCherry(leu1+)</i><br><i>ars1::41nmt1p-GFP-atg8(ura4+)</i>                                                | Fig. 2B,C           |
| DY37288 | h-          | <i>ura4-D18 atg38A::kanMX leu1-32::41nmt1p-pil1-mCherry-</i><br><i>atg38(161-190)(leu1+) ars1::41nmt1p-GFP-atg8(ura4+)</i>                       | Fig. 2B,C           |
| DY37660 | h-          | <i>ura4-D18 atg38A::kanMX leu1-32::41nmt1p-pil1-mCherry-</i><br><i>atg38(161-190)F178A(leu1+) ars1::41nmt1p-GFP-atg8(ura4+)</i>                  | Fig. 2B,C           |
| DY37663 | h-          | <i>ura4-D18 atg38A::kanMX leu1-32::41nmt1p-pil1-mCherry-</i><br><i>atg38(161-190)V181A(leu1+) ars1::41nmt1p-GFP-atg8(ura4+)</i>                  | Fig. 2B,C           |
| DY37666 | h-          | <i>ura4-D18 atg38A::kanMX leu1-32::41nmt1p-pil1-mCherry-</i><br><i>atg38(161-190)F178A V181A(leu1+) ars1::41nmt1p-GFP-</i><br><i>atg8(ura4+)</i> | Fig. 2B,C           |
| DY38114 | h-          | <i>ura4-D18 atg38A::kanMX leu1-32::41nmt1p-pil1-mCherry-</i><br><i>atg38(161-190)(leu1+) ars1::41nmt1p-GFP-atg8P52A R67A(ura4+)</i>              | Fig. 2B,C           |
| DY31436 | h+          | <i>his3-D1 ura4-D18 leu1-32::41nmt1p-pil1-mCherry(leu1+)</i><br><i>ars1::41nmt1p-hfl1(386-409)-GFP(ura4+)</i>                                    | Fig. 2E,F           |
| DY31440 | h+          | <i>his3-D1 ura4-D18 leu1-32::41nmt1p-pil1-mCherry-atg8(1-</i><br><i>115)(leu1+) ars1::41nmt1p-hfl1(386-409)-GFP(ura4+)</i>                       | Fig. 2E,F           |
| DY32321 | h?          | <i>his3-D1 ura4-D18 leu1-32::41nmt1p-pil1-mCherry-atg8(1-</i><br><i>115)(leu1+) ars1::41nmt1p-hfl1(386-409)Y398A-GFP(ura4+)</i>                  | Fig. 2E,F           |
| DY39651 | h+          | <i>ura4-D18 leu1-32::41nmt1p-lig4-GFP (leu1+) ars1::41nmt1p-pil1-</i><br><i>mCherry(ura4+)</i>                                                   | Fig. 3B,C           |
| DY39653 | h+          | <i>ura4-D18 leu1-32::41nmt1p-lig4-GFP (leu1+) ars1::41nmt1p-pil1-</i><br><i>mCherry-xrc4(ura4+)</i>                                              | Fig. 3B,C           |
| DY39818 | h?          | <i>ura4-D18 leu1-32::41nmt1p-lig4(741-913)-GFP (leu1+)</i><br><i>ars1::41nmt1p-pil1-mCherry(ura4+)</i>                                           | Fig. 3D,E           |
| DY40113 | h?          | <i>ura4-D18 leu1-32::41nmt1p-lig4(741-913)-GFP (leu1+)</i><br><i>ars1::41nmt1p-pil1-mCherry-xrc4(ura4+)</i>                                      | Fig. 3D,E           |
| DY44709 | h-          | <i>ura4-D18 leu1-32::41nmt1p-GFP(leu1+) ars1::41nmt1p-pil1-</i><br><i>mCherry-atg17(ura4+)</i>                                                   | Fig. 4B,C           |
| DY44711 | h-          | <i>ura4-D18 leu1-32::41nmt1p-atg1-GFP(leu1+) ars1::41nmt1p-pil1-</i><br><i>mCherry-atg17(ura4+)</i>                                              | Fig. 4B,C,<br>S3C,D |
| DY44713 | h-          | <i>ura4-D18 leu1-32::41nmt1p-atg11-GFP(leu1+) ars1::41nmt1p-pil1-</i><br><i>mCherry-atg17(ura4+)</i>                                             | Fig. 4B,C           |
| DY44715 | h-          | <i>ura4-D18 leu1-32::41nmt1p-atg13-GFP(leu1+) ars1::41nmt1p-pil1-</i><br><i>mCherry-atg17(ura4+)</i>                                             | Fig. 4B,C           |
| DY44717 | h-          | <i>ura4-D18 leu1-32::41nmt1p-atg17-GFP(leu1+) ars1::41nmt1p-pil1-</i><br><i>mCherry-atg17(ura4+)</i>                                             | Fig. 4B,C           |
| DY44719 | h-          | <i>ura4-D18 leu1-32::41nmt1p-atg101-GFP(leu1+) ars1::41nmt1p-</i><br><i>pil1-mCherry-atg17(ura4+)</i>                                            | Fig. 4B,C           |

|         |    |                                                                                                                                                                                                                     |                  |
|---------|----|---------------------------------------------------------------------------------------------------------------------------------------------------------------------------------------------------------------------|------------------|
| DY31679 | h- | <i>ura4-D18 41nmt1p-CFP-vps34::hphMX leu1-32::nmt41-Pil1-mCherry(Leu1+)</i>                                                                                                                                         | Fig. 5E,F        |
| DY31681 | h- | <i>ura4-D18 41nmt1p-CFP-vps34::hphMX leu1-32::41nmt1p-pil1-mCherry-atg38(Leu1+)</i>                                                                                                                                 | Fig. 5E,F        |
| DY31685 | h- | <i>ura4-D18 41nmt1p-CFP-vps34::hphMX leu1-32::41nmt1p-pil1-mCherry-atg38(<math>\Delta</math>153-160)(Leu1+)</i>                                                                                                     | Fig. 5E,F        |
| DY31689 | h- | <i>ura4-D18 41nmt1p-CFP-vps34::hphMX leu1-32::41nmt1p-pil1-mCherry-atg38F157A(Leu1+)</i>                                                                                                                            | Fig. 5E,F        |
| DY30042 | h? | <i>ura4-D18 atg38<math>\Delta</math>::kanMX pho8<math>\Delta</math>::kanMX leu1-32::41nmt1p-pho8<math>\Delta</math>60(<i>S.cerevesiae</i>)-GFP(<i>leu1+</i>) ars1::pDUAL-vector(<i>ura4+</i>)</i>                   | Fig. 5G          |
| DY31619 | h? | <i>ura4-D18 atg38<math>\Delta</math>::kanMX pho8<math>\Delta</math>::kanMX leu1-32::41nmt1p-pho8<math>\Delta</math>60(<i>S.cerevesiae</i>)-GFP(<i>leu1+</i>) ars1::nmt1p-atg38-mCherry(<i>ura4+</i>)</i>            | Fig. 5G          |
| DY31651 | h? | <i>ura4-D18 atg38<math>\Delta</math>::kanMX pho8<math>\Delta</math>::kanMX leu1-32::41nmt1p-pho8<math>\Delta</math>60(<i>S.cerevesiae</i>)-GFP(<i>leu1+</i>) ars1::nmt1p-atg38F157A-mCherry(<i>ura4+</i>)</i>       | Fig. 5G          |
| DY31623 | h? | <i>ura4-D18 atg38<math>\Delta</math>::kanMX pho8<math>\Delta</math>::kanMX leu1-32::41nmt1p-pho8<math>\Delta</math>60(<i>S.cerevesiae</i>)-GFP(<i>leu1+</i>) ars1::nmt1p-atg38-mCherry-vps34(<i>ura4+</i>)</i>      | Fig. 5G          |
| DY31653 | h? | <i>ura4-D18 atg38<math>\Delta</math>::kanMX pho8<math>\Delta</math>::kanMX leu1-32::41nmt1p-pho8<math>\Delta</math>60(<i>S.cerevesiae</i>)-GFP(<i>leu1+</i>) ars1::nmt1p-atg38F157A-mCherry-vps34(<i>ura4+</i>)</i> | Fig. 5G          |
| DY36366 | h+ | <i>ura4-D18 leu1-32::41nmt1p-GFP-atg38(<i>leu1+</i>) ars1::41nmt1p-pil1-mCherry-vps15(<i>ura4+</i>)</i>                                                                                                             | Fig. 6A,B, S4C,D |
| DY43605 | h? | <i>ura4-D18 41nmt1p-CFP-vps34::hphMX leu1-32::41nmt1p-GFP-atg38(<i>leu1+</i>) ars1::41nmt1p-pil1-mCherry-vps15(<i>ura4+</i>)</i>                                                                                    | Fig. 6A,B        |
| DY32233 | h- | <i>ura4-D18 leu1-32::41nmt1p-pil1-mCherry-atg38(<i>leu1+</i>) ars1::41nmt1p-GFP-vps15(<i>ura4+</i>)</i>                                                                                                             | Fig. 6C,D        |
| DY33372 | h- | <i>ura4-D18 41nmt1p-CFP-vps34::hphMX leu1-32::41nmt1p-pil1-mCherry-atg38(<i>leu1+</i>) ars1::41nmt1p-GFP-vps15(<i>ura4+</i>)</i>                                                                                    | Fig. 6C,D        |
| DY33590 | h- | <i>ura4-D18 leu1-32::41nmt1p-GFP-vps15(<i>leu1+</i>) ars1::41nmt1p-pil1-mCherry-vps34(1-250)(<i>ura4+</i>)</i>                                                                                                      | Fig. 6E,F        |
| DY33593 | h- | <i>ura4-D18 leu1-32::41nmt1p-GFP-vps15(<i>leu1+</i>) ars1::41nmt1p-pil1-mCherry-vps34(251-801)(<i>ura4+</i>)</i>                                                                                                    | Fig. 6E,F        |
| DY33585 | h- | <i>ura4-D18 leu1-32::41nmt1p-GFP-atg38(<i>leu1+</i>) ars1::41nmt1p-pil1-mCherry-vps34(1-250)(<i>ura4+</i>)</i>                                                                                                      | Fig. 6G,H        |
| DY33587 | h- | <i>ura4-D18 leu1-32::41nmt1p-GFP-atg38(<i>leu1+</i>) ars1::41nmt1p-pil1-mCherry-vps34(251-801)(<i>ura4+</i>)</i>                                                                                                    | Fig. 6G,H        |
| DY36282 | h+ | <i>ura4-D18 leu1-32::41nmt1p-GFP-vps15(<i>leu1+</i>) ars1::41nmt1p-pil1-mCherry-atg14(<i>ura4+</i>)</i>                                                                                                             | Fig. 7A,B, S5C,D |
| DY36694 | h+ | <i>ura4-D18 his3::41nmt1p-CFP-atg6(<i>his3- hphMX</i>) leu1-32::41nmt1p-GFP-vps15(<i>leu1+</i>) ars1::41nmt1p-pil1-mCherry-atg14(<i>ura4+</i>)</i>                                                                  | Fig. 7A,B        |

|         |    |                                                                                                                                                          |                  |
|---------|----|----------------------------------------------------------------------------------------------------------------------------------------------------------|------------------|
| DY36996 | h? | <i>vps34Δ::kanMX ura4-D18 his3::41nmt1p-CFP-atg6(his3- hphMX) leu1-32::41nmt1p-GFP-vps15(leu1+) ars1::41nmt1p-pil1-mCherry-atg14(ura4+)</i>              | Fig. 7A,B        |
| DY36534 | h+ | <i>ura4-D18 leu1-32::41nmt1p-GFP-vps15(leu1+) ars1::41nmt1p-pil1-mCherry-vps38(ura4+)</i>                                                                | Fig. 7C,D, S6A,B |
| DY36697 | h+ | <i>ura4-D18 his3::41nmt1p-CFP-atg6(his3- hphMX) leu1-32::41nmt1p-GFP-vps15(leu1+) ars1::41nmt1p-pil1-mCherry-vps38(ura4+)</i>                            | Fig. 7C,D        |
| DY36999 | h? | <i>vps34Δ::kanMX ura4-D18 his3::41nmt1p-CFP-atg6(his3- hphMX) leu1-32::41nmt1p-GFP-vps15(leu1+) ars1::41nmt1p-pil1-mCherry-vps38(ura4+)</i>              | Fig. 7C,D        |
| DY36352 | h+ | <i>ura4-D18 leu1-32::41nmt1p-GFP-vps15(leu1+) ars1::41nmt1p-pil1-mCherry-atg6(ura4+)</i>                                                                 | Fig. 7E,F, S5A,B |
| DY36779 | h+ | <i>ura4-D18 his3::41nmt1p-CFP-atg14(his3- hphMX) leu1-32::41nmt1p-GFP-vps15(leu1+) ars1::41nmt1p-pil1-mCherry-atg6(ura4+)</i>                            | Fig. 7E,F        |
| DY36782 | h+ | <i>ura4-D18 his3::41nmt1p-CFP-vps38(his3- hphMX) leu1-32::41nmt1p-GFP-vps15(leu1+) ars1::41nmt1p-pil1-mCherry-atg6(ura4+)</i>                            | Fig. 7E,F        |
| DY36711 | h- | <i>ura4-D18 his3::41nmt1p-CFP-atg6(his3- hphMX) leu1-32::41nmt1p-GFP-atg14(leu1+) ars1::41nmt1p-pil1-mCherry-vps34(ura4+)</i>                            | Fig. 8A,B        |
| DY37873 | h? | <i>ura4-D18 41nmt1p-13Myc-vps15::hphMX his3::41nmt1p-CFP-atg6(his3- hphMX) leu1-32::41nmt1p-GFP-atg14(leu1+) ars1::41nmt1p-pil1-mCherry-vps34(ura4+)</i> | Fig. 8A,B        |
| DY36714 | h- | <i>ura4-D18 his3::41nmt1p-CFP-atg6(his3- hphMX) leu1-32::41nmt1p-GFP-vps38(leu1+) ars1::41nmt1p-pil1-mCherry-vps34(ura4+)</i>                            | Fig. 8C,D        |
| DY37877 | h? | <i>ura4-D18 41nmt1p-13Myc-vps15::hphMX his3::41nmt1p-CFP-atg6(his3- hphMX) leu1-32::41nmt1p-GFP-vps38(leu1+) ars1::41nmt1p-pil1-mCherry-vps34(ura4+)</i> | Fig. 8C,D        |
| DY44733 | h- | <i>ura4-D18 leu1-32::41nmt1p-GFP(leu1+) ars1::41nmt1p-pil1-mCherry(ura4+)</i>                                                                            | Fig. S1A,B       |
| DY44735 | h- | <i>ura4-D18 leu1-32::41nmt1p-atg1-GFP(leu1+) ars1::41nmt1p-pil1-mCherry(ura4+)</i>                                                                       | Fig. S1A,B       |
| DY44737 | h- | <i>ura4-D18 leu1-32::41nmt1p-atg11-GFP(leu1+) ars1::41nmt1p-pil1-mCherry(ura4+)</i>                                                                      | Fig. S1A,B       |
| DY44739 | h- | <i>ura4-D18 leu1-32::41nmt1p-atg13-GFP(leu1+) ars1::41nmt1p-pil1-mCherry(ura4+)</i>                                                                      | Fig. S1A,B       |
| DY44741 | h- | <i>ura4-D18 leu1-32::41nmt1p-atg17-GFP(leu1+) ars1::41nmt1p-pil1-mCherry(ura4+)</i>                                                                      | Fig. S1A,B       |
| DY44743 | h- | <i>ura4-D18 leu1-32::41nmt1p-atg101-GFP(leu1+) ars1::41nmt1p-pil1-mCherry(ura4+)</i>                                                                     | Fig. S1A,B       |
| DY44767 | h- | <i>ura4-D18 leu1-32::41nmt1p-GFP(leu1+) ars1::41nmt1p-pil1-mCherry-atg1(ura4+)</i>                                                                       | Fig. S1C,D       |
| DY44769 | h- | <i>ura4-D18 leu1-32::41nmt1p-atg1-GFP(leu1+) ars1::41nmt1p-pil1-mCherry-atg1(ura4+)</i>                                                                  | Fig. S1C,D       |

|         |    |                                                                                             |                      |
|---------|----|---------------------------------------------------------------------------------------------|----------------------|
| DY44770 | h- | <i>ura4-D18 leu1-32::41nmt1p-atg11-GFP(leu1+) ars1::41nmt1p-pill-mCherry-atg1(ura4+)</i>    | Fig. S1C,D           |
| DY44771 | h- | <i>ura4-D18 leu1-32::41nmt1p-atg13-GFP(leu1+) ars1::41nmt1p-pill-mCherry-atg1(ura4+)</i>    | Fig. S1C,D           |
| DY44773 | h- | <i>ura4-D18 leu1-32::41nmt1p-atg17-GFP(leu1+) ars1::41nmt1p-pill-mCherry-atg1(ura4+)</i>    | Fig. S1C,D,<br>S3A,B |
| DY44775 | h- | <i>ura4-D18 leu1-32::41nmt1p-atg101-GFP(leu1+) ars1::41nmt1p-pill-mCherry-atg1(ura4+)</i>   | Fig. S1C,D           |
| DY44756 | h- | <i>ura4-D18 leu1-32::41nmt1p-GFP(leu1+) ars1::41nmt1p-pill-mCherry-atg11(ura4+)</i>         | Fig. S1E,F           |
| DY44758 | h- | <i>ura4-D18 leu1-32::41nmt1p-atg1-GFP(leu1+) ars1::41nmt1p-pill-mCherry-atg11(ura4+)</i>    | Fig. S1E,F           |
| DY44759 | h- | <i>ura4-D18 leu1-32::41nmt1p-atg11-GFP(leu1+) ars1::41nmt1p-pill-mCherry-atg11(ura4+)</i>   | Fig. S1E,F           |
| DY44761 | h- | <i>ura4-D18 leu1-32::41nmt1p-atg13-GFP(leu1+) ars1::41nmt1p-pill-mCherry-atg11(ura4+)</i>   | Fig. S1E,F,<br>S3E,F |
| DY44762 | h- | <i>ura4-D18 leu1-32::41nmt1p-atg17-GFP(leu1+) ars1::41nmt1p-pill-mCherry-atg11(ura4+)</i>   | Fig. S1E,F           |
| DY44764 | h- | <i>ura4-D18 leu1-32::41nmt1p-atg101-GFP(leu1+) ars1::41nmt1p-pill-mCherry-atg11(ura4+)</i>  | Fig. S1E,F           |
| DY44721 | h- | <i>ura4-D18 leu1-32::41nmt1p-GFP(leu1+) ars1::41nmt1p-pill-mCherry-atg13(ura4+)</i>         | Fig. S2A,B           |
| DY44723 | h- | <i>ura4-D18 leu1-32::41nmt1p-atg1-GFP(leu1+) ars1::41nmt1p-pill-mCherry-atg13(ura4+)</i>    | Fig. S2A,B           |
| DY44725 | h- | <i>ura4-D18 leu1-32::41nmt1p-atg11-GFP(leu1+) ars1::41nmt1p-pill-mCherry-atg13(ura4+)</i>   | Fig. S2A,B,<br>S3G,H |
| DY44727 | h- | <i>ura4-D18 leu1-32::41nmt1p-atg13-GFP(leu1+) ars1::41nmt1p-pill-mCherry-atg13(ura4+)</i>   | Fig. S2A,B           |
| DY44729 | h- | <i>ura4-D18 leu1-32::41nmt1p-atg17-GFP(leu1+) ars1::41nmt1p-pill-mCherry-atg13(ura4+)</i>   | Fig. S2A,B           |
| DY44731 | h- | <i>ura4-D18 leu1-32::41nmt1p-atg101-GFP(leu1+) ars1::41nmt1p-pill-mCherry-atg13(ura4+)</i>  | Fig. S2A,B           |
| DY44697 | h- | <i>ura4-D18 leu1-32::41nmt1p-GFP(leu1+) ars1::41nmt1p-pill-mCherry-atg101(ura4+)</i>        | Fig. S2C,D           |
| DY44699 | h- | <i>ura4-D18 leu1-32::41nmt1p-atg1-GFP(leu1+) ars1::41nmt1p-pill-mCherry-atg101(ura4+)</i>   | Fig. S2C,D           |
| DY44701 | h- | <i>ura4-D18 leu1-32::41nmt1p-atg11-GFP(leu1+) ars1::41nmt1p-pill-mCherry-atg101(ura4+)</i>  | Fig. S2C,D           |
| DY44703 | h- | <i>ura4-D18 leu1-32::41nmt1p-atg13-GFP(leu1+) ars1::41nmt1p-pill-mCherry-atg101(ura4+)</i>  | Fig. S2C,D           |
| DY44705 | h- | <i>ura4-D18 leu1-32::41nmt1p-atg17-GFP(leu1+) ars1::41nmt1p-pill-mCherry-atg101(ura4+)</i>  | Fig. S2C,D           |
| DY44707 | h- | <i>ura4-D18 leu1-32::41nmt1p-atg101-GFP(leu1+) ars1::41nmt1p-pill-mCherry-atg101(ura4+)</i> | Fig. S2C,D           |

|         |    |                                                                                                                  |                      |
|---------|----|------------------------------------------------------------------------------------------------------------------|----------------------|
| DY48488 | h? | <i>atg13Δ::kanMX ura4-D18 leu1-32::41nmt1p-atg17-GFP(leu1+)</i><br><i>ars1::41nmt1p-pil1-mCherry-atg1(ura4+)</i> | S3A,B                |
| DY48486 | h? | <i>atg13Δ::kanMX ura4-D18 leu1-32::41nmt1p-atg1-GFP(leu1+)</i><br><i>ars1::41nmt1p-pil1-mCherry-atg17(ura4+)</i> | S3A,B                |
| DY46360 | h? | <i>atg1Δ::natMX ura4-D18 leu1-32::41nmt1p-atg13-GFP(leu1+)</i><br><i>ars1::41nmt1p-pil1-mCherry-atg11(ura4+)</i> | Fig. S3E,F           |
| DY46358 | h? | <i>atg1Δ::natMX ura4-D18 leu1-32::41nmt1p-atg11-GFP(leu1+)</i><br><i>ars1::41nmt1p-pil1-mCherry-atg13(ura4+)</i> | Fig. S3G,H           |
| DY32961 | h- | <i>ura4-D18 leu1-32::41nmt1p-GFP-vps15(leu1+)</i> <i>ars1::41nmt1p-pil1-</i><br><i>mCherry(ura4+)</i>            | Fig. S4A,B           |
| DY38750 | h+ | <i>ura4-D18 leu1-32::41nmt1p-GFP-vps34(leu1+)</i> <i>ars1::41nmt1p-pil1-</i><br><i>mCherry(ura4+)</i>            | Fig. S4A,B           |
| DY33173 | h- | <i>ura4-D18 leu1-32::41nmt1p-GFP-atg6(leu1+)</i> <i>ars1::41nmt1p-pil1-</i><br><i>mCherry(ura4+)</i>             | Fig. S4A,B           |
| DY32957 | h- | <i>ura4-D18 leu1-32::41nmt1p-GFP-atg14(leu1+)</i> <i>ars1::41nmt1p-pil1-</i><br><i>mCherry(ura4+)</i>            | Fig. S4A,B           |
| DY32959 | h- | <i>ura4-D18 leu1-32::41nmt1p-GFP-atg38(leu1+)</i> <i>ars1::41nmt1p-pil1-</i><br><i>mCherry(ura4+)</i>            | Fig. S4A,B           |
| DY32963 | h- | <i>ura4-D18 leu1-32::41nmt1p-GFP-vps38(leu1+)</i> <i>ars1::41nmt1p-pil1-</i><br><i>mCherry(ura4+)</i>            | Fig. S4A,B           |
| DY39067 | h? | <i>ura4-D18 leu1-32::41nmt1p-GFP(leu1+)</i> <i>ars1::41nmt1p-pil1-</i><br><i>mCherry(ura4+)</i>                  | Fig. S4A,B           |
| DY36368 | h+ | <i>ura4-D18 leu1-32::41nmt1p-GFP-vps15(leu1+)</i> <i>ars1::41nmt1p-pil1-</i><br><i>mCherry-vps15(ura4+)</i>      | Fig. S4C,D           |
| DY36370 | h+ | <i>ura4-D18 leu1-32::41nmt1p-GFP-vps34(leu1+)</i> <i>ars1::41nmt1p-pil1-</i><br><i>mCherry-vps15(ura4+)</i>      | Fig. S4C,D,<br>S7A,B |
| DY36360 | h+ | <i>ura4-D18 leu1-32::41nmt1p-GFP-atg6(leu1+)</i> <i>ars1::41nmt1p-pil1-</i><br><i>mCherry-vps15(ura4+)</i>       | Fig. S4C,D,<br>S8A,B |
| DY36362 | h+ | <i>ura4-D18 leu1-32::41nmt1p-GFP-atg14(leu1+)</i> <i>ars1::41nmt1p-pil1-</i><br><i>mCherry-vps15(ura4+)</i>      | Fig. S4C,D,<br>S8C,D |
| DY36373 | h+ | <i>ura4-D18 leu1-32::41nmt1p-GFP-vps38(leu1+)</i> <i>ars1::41nmt1p-pil1-</i><br><i>mCherry-vps15(ura4+)</i>      | Fig. S4C,D,<br>S8E,F |
| DY39070 | h? | <i>ura4-D18 leu1-32::41nmt1p-GFP(leu1+)</i> <i>ars1::41nmt1p-pil1-</i><br><i>mCherry-vps15(ura4+)</i>            | Fig. S4C,D           |
| DY33191 | h- | <i>ura4-D18 leu1-32::41nmt1p-GFP-vps15(leu1+)</i> <i>ars1::41nmt1p-pil1-</i><br><i>mCherry-vps34(ura4+)</i>      | Fig. S4E,F,<br>S7C,D |
| DY37293 | h+ | <i>ura4-D18 leu1-32::41nmt1p-GFP-vps34(leu1+)</i> <i>ars1::41nmt1p-pil1-</i><br><i>mCherry-vps34(ura4+)</i>      | Fig. S4E,F           |
| DY33370 | h- | <i>ura4-D18 leu1-32::41nmt1p-GFP-atg6(leu1+)</i> <i>ars1::41nmt1p-pil1-</i><br><i>mCherry-vps34(ura4+)</i>       | Fig. S4E,F           |
| DY33186 | h- | <i>ura4-D18 leu1-32::41nmt1p-GFP-atg14(leu1+)</i> <i>ars1::41nmt1p-pil1-</i><br><i>mCherry-vps34(ura4+)</i>      | Fig. S4E,F           |
| DY33189 | h- | <i>ura4-D18 leu1-32::41nmt1p-GFP-atg38(leu1+)</i> <i>ars1::41nmt1p-pil1-</i><br><i>mCherry-vps34(ura4+)</i>      | Fig. S4E,F,<br>S7E,F |

|         |    |                                                                                           |                   |
|---------|----|-------------------------------------------------------------------------------------------|-------------------|
| DY33193 | h- | <i>ura4-D18 leu1-32::41nmt1p-GFP-vps38(leu1+) ars1::41nmt1p-pil1-mCherry-vps34(ura4+)</i> | Fig. S4E,F        |
| DY39073 | h? | <i>ura4-D18 leu1-32::41nmt1p-GFP(leu1+) ars1::41nmt1p-pil1-mCherry-vps34(ura4+)</i>       | Fig. S4E,F        |
| DY36354 | h+ | <i>ura4-D18 leu1-32::41nmt1p-GFP-vps34(leu1+) ars1::41nmt1p-pil1-mCherry-atg6(ura4+)</i>  | Fig. S5A,B        |
| DY36342 | h+ | <i>ura4-D18 leu1-32::41nmt1p-GFP-atg6(leu1+) ars1::41nmt1p-pil1-mCherry-atg6(ura4+)</i>   | Fig. S5A,B        |
| DY36344 | h+ | <i>ura4-D18 leu1-32::41nmt1p-GFP-atg14(leu1+) ars1::41nmt1p-pil1-mCherry-atg6(ura4+)</i>  | Fig. S5A,B, S7I,J |
| DY36350 | h+ | <i>ura4-D18 leu1-32::41nmt1p-GFP-atg38(leu1+) ars1::41nmt1p-pil1-mCherry-atg6(ura4+)</i>  | Fig. S5A,B        |
| DY36357 | h+ | <i>ura4-D18 leu1-32::41nmt1p-GFP-vps38(leu1+) ars1::41nmt1p-pil1-mCherry-atg6(ura4+)</i>  | Fig. S5A,B, S7M,N |
| DY36653 | h+ | <i>ura4-D18 leu1-32::41nmt1p-GFP(leu1+) ars1::41nmt1p-pil1-mCherry-atg6(ura4+)</i>        | Fig. S5A,B        |
| DY36285 | h+ | <i>ura4-D18 leu1-32::41nmt1p-GFP-vps34(leu1+) ars1::41nmt1p-pil1-mCherry-atg14(ura4+)</i> | Fig. S5C,D        |
| DY36273 | h+ | <i>ura4-D18 leu1-32::41nmt1p-GFP-atg6(leu1+) ars1::41nmt1p-pil1-mCherry-atg14(ura4+)</i>  | Fig. S5C,D, S7K,L |
| DY36276 | h+ | <i>ura4-D18 leu1-32::41nmt1p-GFP-atg14(leu1+) ars1::41nmt1p-pil1-mCherry-atg14(ura4+)</i> | Fig. S5C,D        |
| DY36280 | h+ | <i>ura4-D18 leu1-32::41nmt1p-GFP-atg38(leu1+) ars1::41nmt1p-pil1-mCherry-atg14(ura4+)</i> | Fig. S5C,D, S8K,L |
| DY36287 | h+ | <i>ura4-D18 leu1-32::41nmt1p-GFP-vps38(leu1+) ars1::41nmt1p-pil1-mCherry-atg14(ura4+)</i> | Fig. S5C,D        |
| DY39076 | h? | <i>ura4-D18 leu1-32::41nmt1p-GFP(leu1+) ars1::41nmt1p-pil1-mCherry-atg14(ura4+)</i>       | Fig. S5C,D        |
| DY38186 | h+ | <i>ura4-D18 leu1-32::41nmt1p-GFP-vps15(leu1+) ars1::41nmt1p-pil1-mCherry-atg38(ura4+)</i> | Fig. S5E,F        |
| DY38190 | h+ | <i>ura4-D18 leu1-32::41nmt1p-GFP-vps34(leu1+) ars1::41nmt1p-pil1-mCherry-atg38(ura4+)</i> | Fig. S5E,F, S7G,H |
| DY38180 | h+ | <i>ura4-D18 leu1-32::41nmt1p-GFP-atg6(leu1+) ars1::41nmt1p-pil1-mCherry-atg38(ura4+)</i>  | Fig. S5E,F        |
| DY38182 | h+ | <i>ura4-D18 leu1-32::41nmt1p-GFP-atg14(leu1+) ars1::41nmt1p-pil1-mCherry-atg38(ura4+)</i> | Fig. S5E,F        |
| DY38184 | h+ | <i>ura4-D18 leu1-32::41nmt1p-GFP-atg38(leu1+) ars1::41nmt1p-pil1-mCherry-atg38(ura4+)</i> | Fig. S5E,F        |
| DY38188 | h+ | <i>ura4-D18 leu1-32::41nmt1p-GFP-vps38(leu1+) ars1::41nmt1p-pil1-mCherry-atg38(ura4+)</i> | Fig. S5E,F        |
| DY39079 | h? | <i>ura4-D18 leu1-32::41nmt1p-GFP(leu1+) ars1::41nmt1p-pil1-mCherry-atg38(ura4+)</i>       | Fig. S5E,F        |
| DY36535 | h+ | <i>ura4-D18 leu1-32::41nmt1p-GFP-vps15(leu1+) ars1::41nmt1p-pil1-mCherry-vps38(ura4+)</i> | Fig. S6A,B        |



|         |    |                                                                                                                                                  |                      |
|---------|----|--------------------------------------------------------------------------------------------------------------------------------------------------|----------------------|
| DY36536 | h+ | <i>ura4-D18 leu1-32::41nmt1p-GFP-vps34(leu1+) ars1::41nmt1p-pil1-mCherry-vps38(ura4+)</i>                                                        | Fig. S6A,B,<br>S8I,J |
| DY36524 | h+ | <i>ura4-D18 leu1-32::41nmt1p-GFP-atg6(leu1+) ars1::41nmt1p-pil1-mCherry-vps38(ura4+)</i>                                                         | Fig. S6A,B,<br>S7O,P |
| DY36527 | h+ | <i>ura4-D18 leu1-32::41nmt1p-GFP-atg14(leu1+) ars1::41nmt1p-pil1-mCherry-vps38(ura4+)</i>                                                        | Fig. S6A,B           |
| DY36532 | h+ | <i>ura4-D18 leu1-32::41nmt1p-GFP-atg38(leu1+) ars1::41nmt1p-pil1-mCherry-vps38(ura4+)</i>                                                        | Fig. S6A,B           |
| DY36539 | h+ | <i>ura4-D18 leu1-32::41nmt1p-GFP-vps38(leu1+) ars1::41nmt1p-pil1-mCherry-vps38(ura4+)</i>                                                        | Fig. S6A,B           |
| DY39082 | h? | <i>ura4-D18 leu1-32::41nmt1p-GFP(leu1+) ars1::41nmt1p-pil1-mCherry-vps38(ura4+)</i>                                                              | Fig. S6A,B           |
| DY48496 | h? | <i>ura4-D18 his3::41nmt1p-CFP-atg14(his3- hphMX) leu1-32::pDUAL-vector(leu1+) ars1::41nmt1p-pil1-mCherry-atg6(ura4+)</i>                         | Fig. S6C,D           |
| DY48498 | h? | <i>ura4-D18 his3::41nmt1p-CFP-atg14(his3- hphMX) leu1-32::41nmt1p-GFP-vps38(leu1+) ars1::41nmt1p-pil1-mCherry-atg6(ura4+)</i>                    | Fig. S6C,D           |
| DY48500 | h? | <i>ura4-D18 his3::41nmt1p-CFP-atg14(his3- hphMX) leu1-32::nmt1p-GFP-vps38(leu1+) ars1::41nmt1p-pil1-mCherry-atg6(ura4+)</i>                      | Fig. S6C,D           |
| DY48502 | h? | <i>ura4-D18 his3::41nmt1p-CFP-vps38(his3- hphMX) leu1-32::pDUAL-vector(leu1+) ars1::41nmt1p-pil1-mCherry-atg6(ura4+)</i>                         | Fig. S6E,F           |
| DY48504 | h? | <i>ura4-D18 his3::41nmt1p-CFP-vps38(his3- hphMX) leu1-32::41nmt1p-GFP-atg14(leu1+) ars1::41nmt1p-pil1-mCherry-atg6(ura4+)</i>                    | Fig. S6E,F           |
| DY48506 | h? | <i>ura4-D18 his3::41nmt1p-CFP-vps38(his3- hphMX) leu1-32::nmt1p-GFP-atg14(leu1+) ars1::41nmt1p-pil1-mCherry-atg6(ura4+)</i>                      | Fig. S6E,F           |
| DY37751 | h? | <i>atg6Δ::kanMX atg14Δ::kanMX atg38Δ::kanMX vps38Δ::natMX ura4-D18 leu1-32::41nmt1p-GFP-vps34(leu1+) ars1::41nmt1p-pil1-mCherry-vps15(ura4+)</i> | Fig. S7A,B           |
| DY37753 | h? | <i>atg6Δ::kanMX atg14Δ::kanMX atg38Δ::kanMX vps38Δ::natMX ura4-D18 leu1-32::41nmt1p-GFP-vps15(leu1+) ars1::41nmt1p-pil1-mCherry-vps34(ura4+)</i> | Fig. S7C,D           |
| DY38826 | h? | <i>vps15Δ::natMX atg6Δ::kanMX atg14Δ::hphMX ura4-D18 leu1-32::41nmt1p-GFP-atg38(leu1+) ars1::41nmt1p-pil1-mCherry-vps34(ura4+)</i>               | Fig. S7E,F           |
| DY38825 | h? | <i>vps15Δ::natMX atg6Δ::kanMX atg14Δ::hphMX ura4-D18 leu1-32::41nmt1p-GFP-vps34(leu1+) ars1::41nmt1p-pil1-mCherry-atg38(ura4+)</i>               | Fig. S7G,H           |
| DY38814 | h? | <i>vps15Δ::kanMX vps34Δ::natMX atg38Δ::hphMX ura4-D18 leu1-32::41nmt1p-GFP-atg14(leu1+) ars1::41nmt1p-pil1-mCherry-atg6(ura4+)</i>               | Fig. S7I,J           |
| DY38819 | h? | <i>vps15Δ::kanMX vps34Δ::natMX atg38Δ::hphMX ura4-D18 leu1-32::41nmt1p-GFP-atg6(leu1+) ars1::41nmt1p-pil1-mCherry-atg14(ura4+)</i>               | Fig. S7K,L           |

|         |    |                                                                                                                               |            |
|---------|----|-------------------------------------------------------------------------------------------------------------------------------|------------|
| DY37494 | h? | <i>vps15Δ::kanMX vps34Δ::natMX ura4-D18 leu1-32::41nmt1p-GFP-vps38(leu1+) ars1::41nmt1p-pil1-mCherry-atg6(ura4+)</i>          | Fig. S7M,N |
| DY37491 | h? | <i>vps15Δ::kanMX vps34Δ::natMX ura4-D18 leu1-32::41nmt1p-GFP-atg6(leu1+) ars1::41nmt1p-pil1-mCherry-vps38(ura4+)</i>          | Fig. S7O,P |
| DY39042 | h? | <i>ura4-D18 41nmt1p-CFP-vps34::hphMX leu1-32::41nmt1p-GFP-atg6(leu1+) ars1::41nmt1p-pil1-mCherry-vps15(ura4+)</i>             | Fig. S8A,B |
| DY39045 | h? | <i>ura4-D18 41nmt1p-CFP-vps34::hphMX leu1-32::41nmt1p-GFP-atg14(leu1+) ars1::41nmt1p-pil1-mCherry-vps15(ura4+)</i>            | Fig. S8C,D |
| DY39049 | h? | <i>ura4-D18 41nmt1p-CFP-vps34::hphMX leu1-32::41nmt1p-GFP-vps38(leu1+) ars1::41nmt1p-pil1-mCherry-vps15(ura4+)</i>            | Fig. S8E,F |
| DY36284 | h+ | <i>ura4-D18 leu1-32::41nmt1p-GFP-vps34(leu1+) ars1::41nmt1p-pil1-mCherry-atg14(ura4+)</i>                                     | Fig. S8G,H |
| DY36706 | h+ | <i>ura4-D18 his3::41nmt1p-CFP-atg6(his3- hphMX) leu1-32::41nmt1p-GFP-vps34(leu1+) ars1::41nmt1p-pil1-mCherry-atg14(ura4+)</i> | Fig. S8G,H |
| DY36709 | h+ | <i>ura4-D18 his3::41nmt1p-CFP-atg6(his3- hphMX) leu1-32::41nmt1p-GFP-vps34(leu1+) ars1::41nmt1p-pil1-mCherry-vps38(ura4+)</i> | Fig. S8I,J |
| DY39090 | h? | <i>ura4-D18 his3::41nmt1p-CFP-atg6(his3- hphMX) leu1-32::41nmt1p-GFP-atg38(leu1+) ars1::41nmt1p-pil1-mCherry-atg14(ura4+)</i> | Fig. S8K,L |

**Table S2.** Plasmids used in this study

| Addgene ID | Name    | Descriptive name                                                          | Description                                                                                             |
|------------|---------|---------------------------------------------------------------------------|---------------------------------------------------------------------------------------------------------|
| 174012     | pDB4924 | pDUAL- <i>41nmt1</i> p-Pil1-mCherry                                       | pDUAL plasmid expressing Pil1-mCherry from <i>41nmt1</i> promoter                                       |
| 174016     | pDB4925 | pDUAL- <i>41nmt1</i> p-Pil1-mCherry-Atg38(161-190)                        | pDUAL plasmid expressing Pil1-mCherry-Atg38(161-190) from <i>41nmt1</i> promoter                        |
|            | pDB4926 | pDUAL- <i>41nmt1</i> p-Pil1-mCherry-Atg38(161-190) <sup>F178A</sup>       | pDUAL plasmid expressing Pil1-mCherry-Atg38(161-190) <sup>F178A</sup> from <i>41nmt1</i> promoter       |
|            | pDB4927 | pDUAL- <i>41nmt1</i> p-Pil1-mCherry-Atg38(161-190) <sup>V181A</sup>       | pDUAL plasmid expressing Pil1-mCherry-Atg38(161-190) <sup>V181A</sup> from <i>41nmt1</i> promoter       |
|            | pDB4928 | pDUAL- <i>41nmt1</i> p-Pil1-mCherry-Atg38(161-190) <sup>F178A V181A</sup> | pDUAL plasmid expressing Pil1-mCherry-Atg38(161-190) <sup>F178A V181A</sup> from <i>41nmt1</i> promoter |
| 174017     | pDB4658 | pDUAL- <i>41nmt1</i> p-GFP-Atg8                                           | pDUAL plasmid expressing GFP-Atg8 from <i>41nmt1</i> promoter                                           |
|            | pDB4659 | pDUAL- <i>41nmt1</i> p-GFP-Atg8 <sup>P52A R67A</sup>                      | pDUAL plasmid expressing GFP-Atg8 <sup>P52A R67A</sup> from <i>41nmt1</i> promoter                      |
|            | pDB4929 | pDUAL- <i>41nmt1</i> p-Pil1-mCherry-Atg8(1-115)                           | pDUAL plasmid expressing Pil1-mCherry-Atg8(1-115) from <i>41nmt1</i> promoter                           |
|            | pDB4930 | pDUAL- <i>41nmt1</i> p-Pil1-mCherry-Xrc4                                  | pDUAL plasmid expressing Pil1-mCherry-Xrc4 from <i>41nmt1</i> promoter                                  |
|            | pDB4931 | pDUAL- <i>41nmt1</i> p-Lig4-GFP                                           | pDUAL plasmid expressing Lig4-GFP from <i>41nmt1</i> promoter                                           |
|            | pDB4932 | pDUAL- <i>41nmt1</i> p-Lig4(741-913)-GFP                                  | pDUAL plasmid expressing Lig4(741-913)-GFP from <i>41nmt1</i> promoter                                  |
|            | pDB4933 | pDUAL- <i>41nmt1</i> p-Pil1-mCherry-Atg1                                  | pDUAL plasmid expressing Pil1-mCherry-Atg1 from <i>41nmt1</i> promoter                                  |
|            | pDB4934 | pDUAL- <i>41nmt1</i> p-Pil1-mCherry-Atg11                                 | pDUAL plasmid expressing Pil1-mCherry-Atg11 from <i>41nmt1</i> promoter                                 |
|            | pDB4935 | pDUAL- <i>41nmt1</i> p-Pil1-mCherry-Atg13                                 | pDUAL plasmid expressing Pil1-mCherry-Atg13 from <i>41nmt1</i> promoter                                 |
|            | pDB4936 | pDUAL- <i>41nmt1</i> p-Pil1-mCherry-Atg17                                 | pDUAL plasmid expressing Pil1-mCherry-Atg17 from <i>41nmt1</i> promoter                                 |
|            | pDB4937 | pDUAL- <i>41nmt1</i> p-Pil1-mCherry-Atg101                                | pDUAL plasmid expressing Pil1-mCherry-Atg101 from <i>41nmt1</i> promoter                                |
|            | pDB4938 | pDUAL- <i>41nmt1</i> p-Atg1-GFP                                           | pDUAL plasmid expressing Atg1-GFP from <i>41nmt1</i> promoter                                           |
|            | pDB4939 | pDUAL- <i>41nmt1</i> p-Atg11-GFP                                          | pDUAL plasmid expressing Atg11-GFP from <i>41nmt1</i> promoter                                          |
|            | pDB4940 | pDUAL- <i>41nmt1</i> p-Atg13-GFP                                          | pDUAL plasmid expressing Atg13-GFP from <i>41nmt1</i> promoter                                          |

|        |         |                                                    |                                                                                  |
|--------|---------|----------------------------------------------------|----------------------------------------------------------------------------------|
|        | pDB4941 | pDUAL- <i>41nmt1p</i> -Atg17-GFP                   | pDUAL plasmid expressing Atg17-GFP from <i>41nmt1</i> promoter                   |
|        | pDB4942 | pDUAL- <i>41nmt1p</i> -Atg101-GFP                  | pDUAL plasmid expressing Atg101-GFP from <i>41nmt1</i> promoter                  |
|        | pDB4943 | pDUAL- <i>41nmt1p</i> -Pil1-mCherry-Vps15          | pDUAL plasmid expressing Pil1-mCherry-Vps15 from <i>41nmt1</i> promoter          |
|        | pDB4944 | pDUAL- <i>41nmt1p</i> -Pil1-mCherry-Vps34          | pDUAL plasmid expressing Pil1-mCherry-Vps34 from <i>41nmt1</i> promoter          |
|        | pDB4945 | pDUAL- <i>41nmt1p</i> -Pil1-mCherry-Atg6           | pDUAL plasmid expressing Pil1-mCherry-Atg6 from <i>41nmt1</i> promoter           |
| 174018 | pDB4946 | pDUAL- <i>41nmt1p</i> -Pil1-mCherry-Atg14          | pDUAL plasmid expressing Pil1-mCherry-Atg14 from <i>41nmt1</i> promoter          |
|        | pDB4947 | pDUAL- <i>41nmt1p</i> -Pil1-mCherry-Atg38          | pDUAL plasmid expressing Pil1-mCherry-Atg38 from <i>41nmt1</i> promoter          |
| 174019 | pDB4948 | pDUAL- <i>41nmt1p</i> -Pil1-mCherry-Vps38          | pDUAL plasmid expressing Pil1-mCherry-Vps38 from <i>41nmt1</i> promoter          |
|        | pDB4949 | pDUAL- <i>41nmt1p</i> -Pil1-mCherry-Vps34(1-250)   | pDUAL plasmid expressing Pil1-mCherry-Vps34(1-250) from <i>41nmt1</i> promoter   |
|        | pDB4950 | pDUAL- <i>41nmt1p</i> -Pil1-mCherry-Vps34(251-801) | pDUAL plasmid expressing Pil1-mCherry-Vps34(251-801) from <i>41nmt1</i> promoter |
|        | pDB4951 | pDUAL- <i>41nmt1p</i> -GFP-Vps15                   | pDUAL plasmid expressing GFP-Vps15 from <i>41nmt1</i> promoter                   |
|        | pDB4952 | pDUAL- <i>41nmt1p</i> -GFP-Vps34                   | pDUAL plasmid expressing GFP-Vps34 from <i>41nmt1</i> promoter                   |
| 174020 | pDB4953 | pDUAL- <i>41nmt1p</i> -GFP-Atg6                    | pDUAL plasmid expressing GFP-Atg6 from <i>41nmt1</i> promoter                    |
|        | pDB4954 | pDUAL- <i>41nmt1p</i> -GFP-Atg14                   | pDUAL plasmid expressing GFP-Atg14 from <i>41nmt1</i> promoter                   |
|        | pDB4955 | pDUAL- <i>41nmt1p</i> -GFP-Atg38                   | pDUAL plasmid expressing GFP-Atg38 from <i>41nmt1</i> promoter                   |
|        | pDB4956 | pDUAL- <i>41nmt1p</i> -GFP-Vps38                   | pDUAL plasmid expressing GFP-Vps38 from <i>41nmt1</i> promoter                   |
|        | pDB4957 | pHIS3H- <i>41nmt1p</i> -CFP-Vps34                  | pHIS3H plasmid expressing CFP-Vps34 from <i>41nmt1</i> promoter                  |
| 174014 | pDB4958 | pHIS3H- <i>41nmt1p</i> -CFP-Atg6                   | pHIS3H plasmid expressing CFP-Atg6 from <i>41nmt1</i> promoter                   |
|        | pDB4959 | pHIS3H- <i>41nmt1p</i> -CFP-Atg14                  | pHIS3H plasmid expressing CFP-Atg14 from <i>41nmt1</i> promoter                  |
|        | pDB4960 | pHIS3H- <i>41nmt1p</i> -CFP-Vps38                  | pHIS3H plasmid expressing CFP-Vps38 from <i>41nmt1</i> promoter                  |
| 174015 | pDB4961 | pHIS3H- <i>41nmt1p</i> -13Myc-Vps15                | pHIS3H plasmid expressing 13Myc-Vps15 from <i>41nmt1</i> promoter                |
|        | pDB4972 | pDUAL- <i>nmt1p</i> -Atg38-mCherry                 | pDUAL plasmid expressing Atg38-mCherry from <i>nmt1</i> promoter                 |

|        |         |                                                            |                                                                                          |
|--------|---------|------------------------------------------------------------|------------------------------------------------------------------------------------------|
|        | pDB4973 | pDUAL- <i>nmt1p</i> -Atg38 <sup>F157A</sup> -mCherry       | pDUAL plasmid expressing Atg38 <sup>F157A</sup> -mCherry from <i>nmt1</i> promoter       |
|        | pDB4974 | pDUAL- <i>nmt1p</i> -Atg38-mCherry-Vps34                   | pDUAL plasmid expressing Atg38-mCherry-Vps34 from <i>nmt1</i> promoter                   |
|        | pDB4975 | pDUAL- <i>nmt1p</i> -Atg38 <sup>F157A</sup> -mcherry-vps34 | pDUAL plasmid expressing Atg38 <sup>F157A</sup> -mCherry-Vps34 from <i>nmt1</i> promoter |
|        | pDB5128 | pDUAL- <i>nmt1p</i> -GFP-Atg14                             | pDUAL plasmid expressing GFP-Atg14 from <i>nmt1</i> promoter                             |
|        | pDB5129 | pDUAL- <i>nmt1p</i> -GFP-Vps38                             | pDUAL plasmid expressing GFP-Vps38 from <i>nmt1</i> promoter                             |
| 174013 | pDB1751 | pDUAL- <i>41nmt1p</i> -GFP                                 | pDUAL plasmid expressing GFP from <i>41nmt1</i> promoter                                 |
